# Supplementary material for: The Pch2 AAA+ ATPase promotes phosphorylation of the Hop1 meiotic checkpoint adaptor in response to synaptonemal complex defects
Source: PubMed Central journal article supplement — Nucleic Acids Res. 2016 Jun 2;44(16):7722–41. doi: 10.1093/nar/gkw506 (PMC5027488; doi:10.1093/nar/gkw506), 2016-06-02
Supplement: supp_gkw506_nar-03706-x-2015-File013.pdf [file supp_gkw506_nar-03706-x-2015-File013.pdf]

## **SUPPLEMENTARY DATA**

### **The Pch2 AAA+ ATPase promotes phosphorylation of the Hop1 meiotic checkpoint adaptor in response to synaptonemal complex defects**

Esther Herruzo<sup>1</sup>, David Ontoso<sup>1</sup>, Sara González-Arranz<sup>1</sup>, Santiago Cavero<sup>1</sup>, Ana Lechuga<sup>1</sup> and Pedro A. San-Segundo<sup>1,\*</sup>

<sup>1</sup> Instituto de Biología Funcional y Genómica. Consejo Superior de Investigaciones Científicas and University of Salamanca, 37007 Salamanca, Spain

\* To whom correspondence should be addressed. Tel: +34 923294902; Fax: +34 923224876; Email: pedross@usal.es

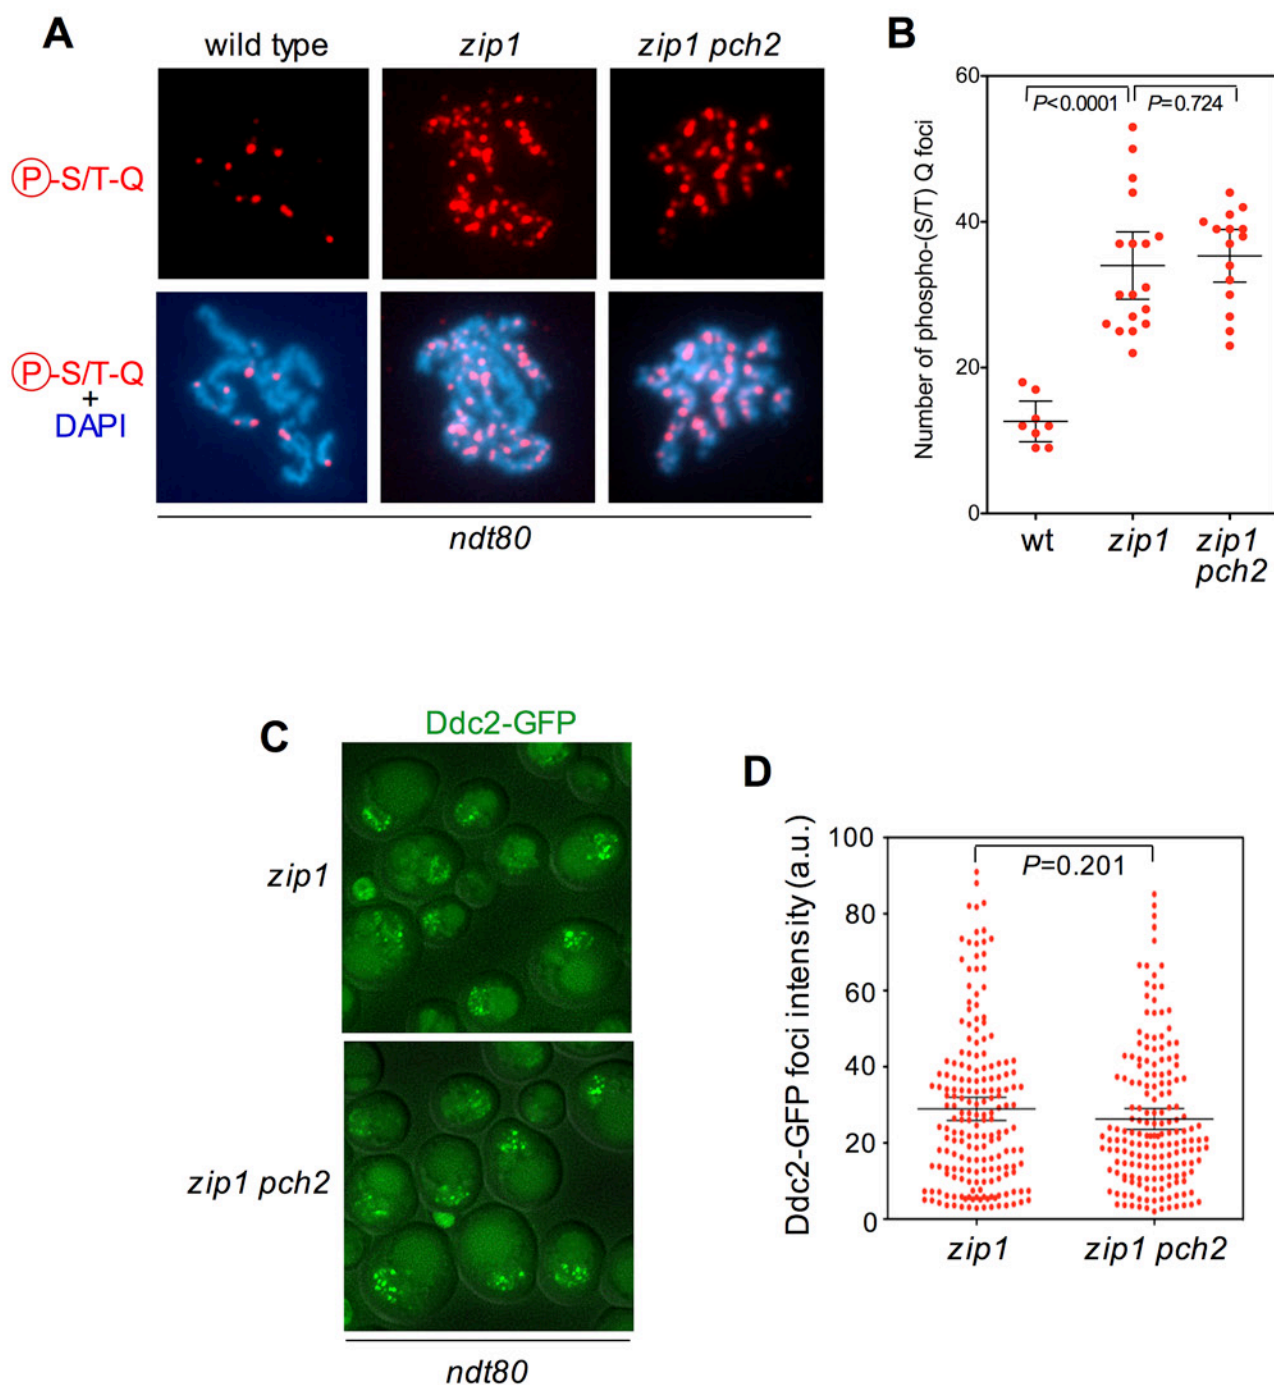

**Figure S1. Pch2 does not affect widespread Mec1 signaling.** (A) Immunofluorescence of meiotic chromosomes stained with anti-phospho-S/T-Q antibodies (red) and DAPI (blue). Representative nuclei are shown. (B) Quantification on the number of phospho-S/T-Q foci per nucleus. (C) Representative images of Ddc2-GFP foci formation in live cells. Maximum projection images of 10-plane stacks are shown. (D) Quantification of the Ddc2-GFP signal. Strains are: DP424 (wild type), DP460 (*zip1*) and DP1251 (*zip1 pch2*). Prophase-arrested *ndt80* cells were analyzed 24 h after meiotic induction.

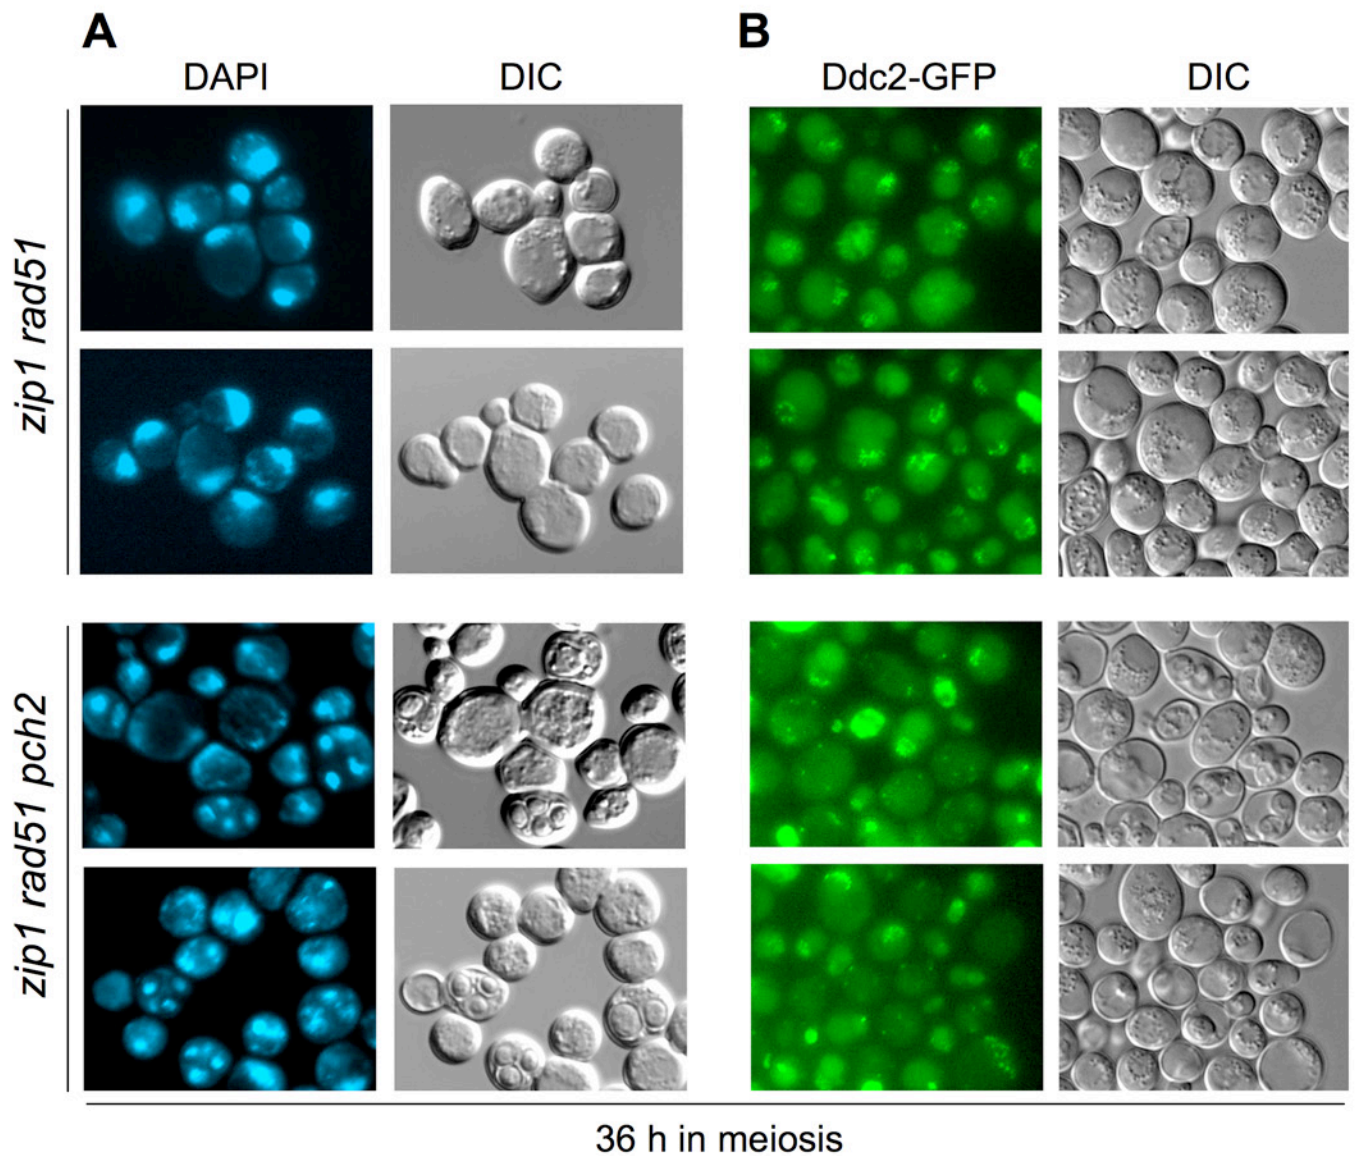

**Figure S2. Representative images of meiotic nuclear divisions and Ddc2 foci detection for the analyses presented in Figure 7B and 7C.**

(A) Aliquots from meiotic cultures were taken at different time points, fixed with ethanol and stained with DAPI to monitor meiotic nuclear divisions. (B) Independent aliquots from the same cultures were directly analyzed by live-cell fluorescence microscopy to detect Ddc2-GFP. Two different representative fields from the 36 h time point of the *zip1 rad51* (DP1381) and *zip1 rad51 pch2* (DP1382) strains are shown for DAPI and other two representative fields for Ddc2-GFP. The corresponding differential interference contrast (DIC) images are also presented.

**A**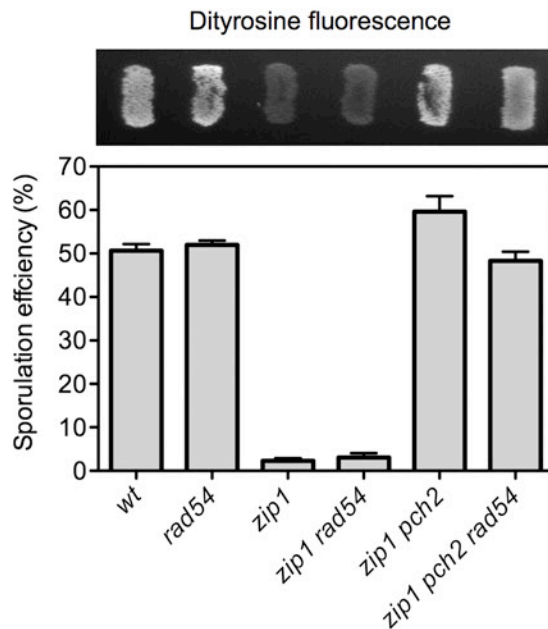**B**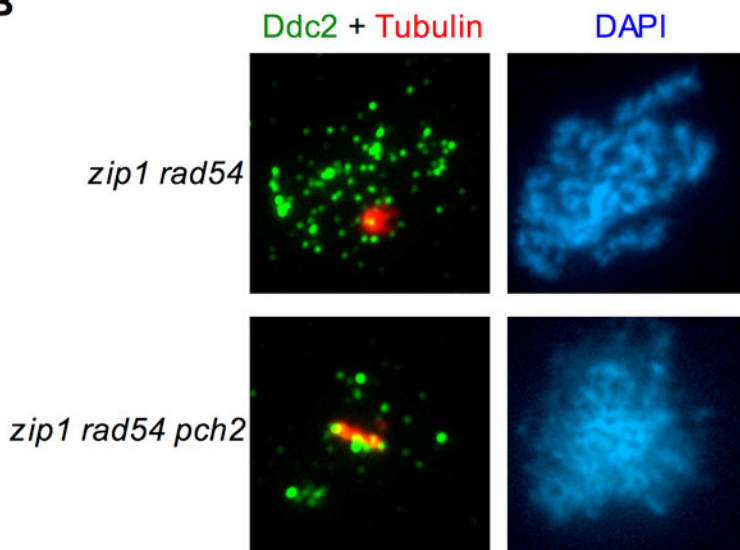

**Figure S3. Deletion of *RAD54* does not prevent meiotic progression in *zip1 pch2*.** (A) Dityrosine fluorescence and sporulation efficiency after three days on sporulation plates. Strains are: DP421 (wild type), DP1168 (*rad54*), DP422 (*zip1*), DP1169 (*zip1 rad54*), DP1161 (*zip1 pch2*) and DP1171 (*zip1 pch2 rad54*). (B) Immunofluorescence of spread meiotic chromosomes stained with anti-tubulin (red), anti-GFP antibodies to detect Ddc2 (green) and DAPI (blue). A representative prophase nucleus from *zip1 rad54* (DP1378) and a representative meiosis I nucleus from *zip1 rad54 pch2* (DP1387) are shown. Spreads were prepared 24 h after meiosis induction.

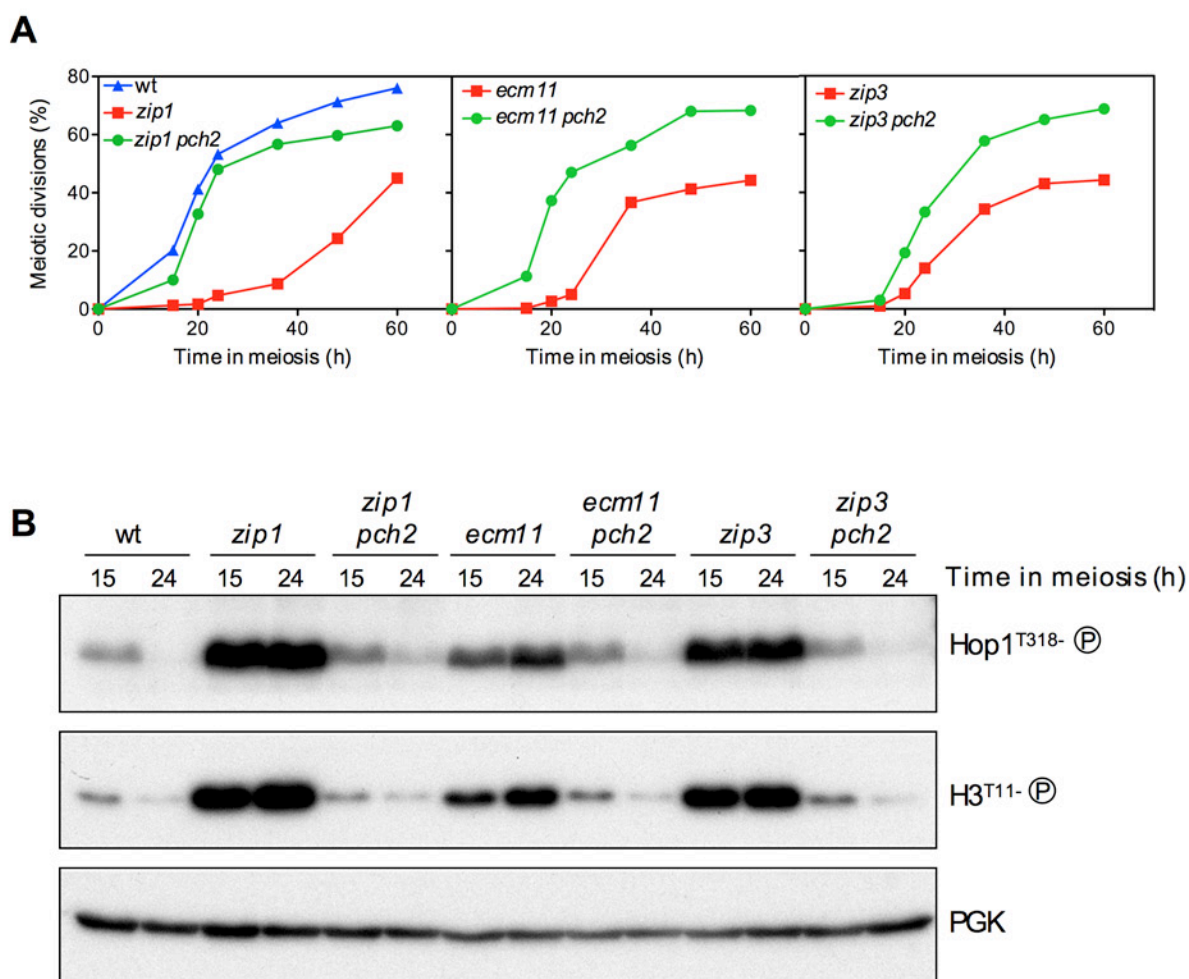

**Figure S4. Pch2 is required for checkpoint activation in the SC-deficient *ecm11* and *zip3* mutants.** (A) Time course of meiotic nuclear divisions; the percentage of cells containing more than two nuclei is represented. (B) Western blot analysis of phospho-Hop1<sup>T318</sup>, phospho-H3<sup>T11</sup> (as indicator of Mek1 activity) and PGK (as loading control). Extracts were prepared at 15 h and 24 h after meiotic induction. Strains are: DP421 (wild type), DP422 (*zip1*), DP1029 (*zip1 pch2*), DP1388 (*ecm11*), DP1390 (*ecm11 pch2*), DP1384 (*zip3*) and DP1386 (*zip3 pch2*).

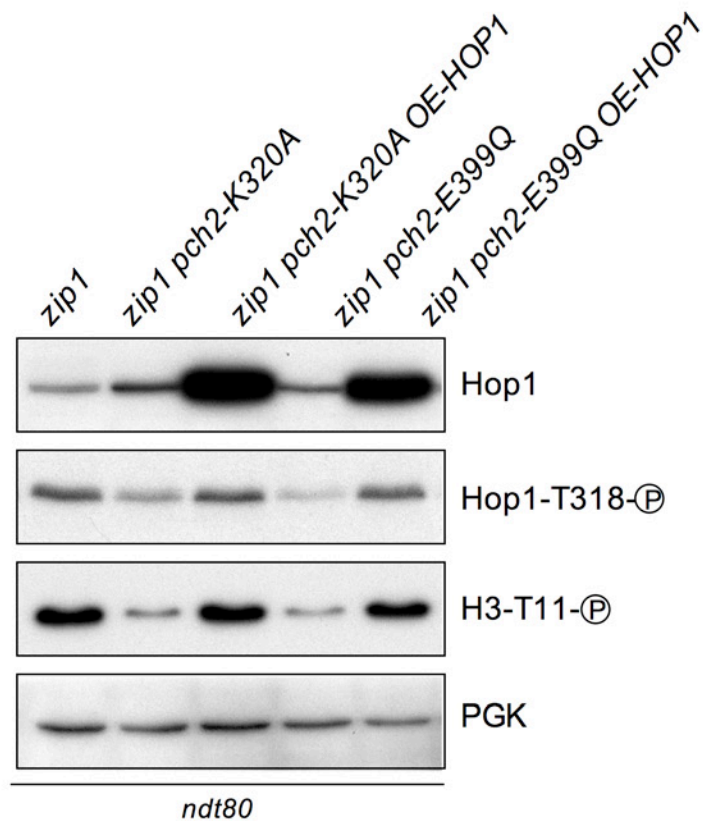

**Figure S5. Hop1 overproduction restores *zip1*-induced checkpoint function in *pch2* ATPase mutants.** Western blot analysis of total Hop 1, phospho-Hop1<sup>T318</sup>, phospho-H3<sup>T11</sup> (as indicator of Mek1 activity) and PGK (as loading control). Extracts were prepared after 24 h of meiotic induction in *ndt80* strains. Strains are: DP1190 (*zip1*), DP1192 (*zip1 pch2-K320A*) and DP1302 (*zip1 pch2-E399Q*), transformed with empty vector or with R1692 (*OE-HOP1*).

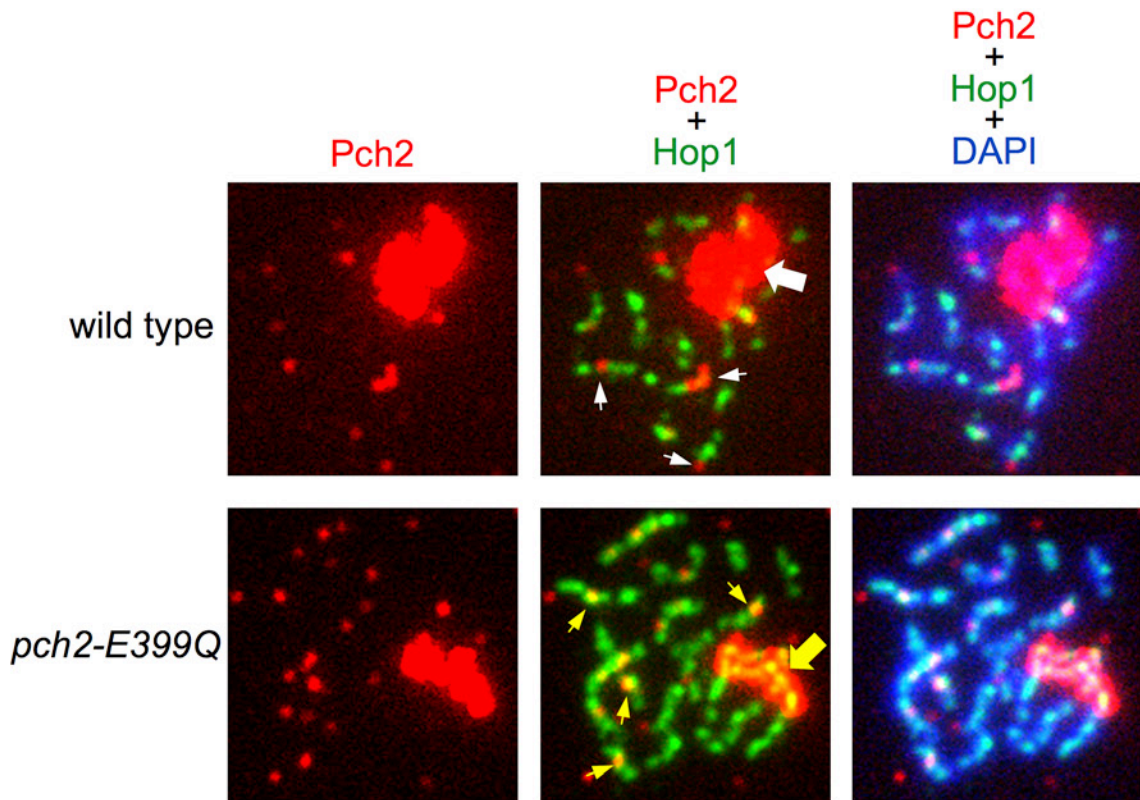

**Figure S6. In contrast with wild-type Pch2, the ATPase-deficient Pch2-E399Q version colocalizes with Hop1 at the rDNA and chromosome axes.** Overexposed images of the corresponding panels shown in Figure 9A to reveal Pch2 chromosomal localization. Thick arrows point to the rDNA. Thin arrows point to interstitial Pch2 chromosomal foci. Strains are: DP1243 (wild type) and DP1262 (*pch2-E399Q*).

**Table S1. *Saccharomyces cerevisiae* strains**

| <b>Strain</b> | <b>Genotype*</b>                                                                                                          | <b>Source</b> |
|---------------|---------------------------------------------------------------------------------------------------------------------------|---------------|
| BR2495        | <i>MATa/MATα leu2-27/leu2-3,112 his4-280/his4-260 arg4-8/ARG4 thr1-1/thr1-4 trp1-1/trp1-289 cyh10/CYH10 ura3-1 ade2-1</i> | Roeder Lab    |
| MY63          | BR2495 <i>zip1::LEU2</i>                                                                                                  | Roeder Lab    |
| S3483         | BR2495 <i>ndt80::LEU2</i>                                                                                                 | Roeder Lab    |
| S4278         | BR2495 <i>zip1::LEU2 ddc1::ADE2</i>                                                                                       | Roeder Lab    |
| S4286         | BR2495 <i>zip1::LYS2 rad17::LEU2 lys2</i>                                                                                 | Roeder Lab    |
| S4295         | BR2495 <i>zip1::LEU2 rad24::TRP1</i>                                                                                      | Roeder Lab    |
| DP174         | BR2495 <i>zip1::LEU2 dot1::TRP1</i>                                                                                       | PSS Lab       |
| DP221         | BR2495 <i>zip1::LEU2 pch2Δ<sup>90-364</sup>-lacZ::TRP1</i>                                                                | This work     |
| DP223         | BR2495 <i>zip1::LEU2 pch2::TRP1</i>                                                                                       | PSS Lab       |
| DP228         | BR2495 <i>zip1::LEU2 pch2Δ<sup>90-364</sup>-lacZ::TRP1/PCH2</i>                                                           | This work     |
| DP267         | BR2495 <i>zip1::LYS2 sir2::LEU2 lys2</i>                                                                                  | PSS Lab       |
| BR1919-2N     | <i>MATa/MATα leu2-3,112 his4-260 thr1-4 trp1-289 ura3-1 ade2-1</i>                                                        | Roeder Lab    |
| DP421         | BR1919-2N <i>lys2ΔNheI</i>                                                                                                | PSS Lab       |
| DP422         | DP421 <i>zip1::LYS2</i>                                                                                                   | PSS Lab       |
| DP424         | DP421 <i>ndt80::LEU2</i>                                                                                                  | PSS Lab       |
| DP428         | DP421 <i>zip1::LYS2 ndt80::LEU2</i>                                                                                       | PSS Lab       |
| DP448         | DP421 <i>DDC2-GFP::TRP1</i>                                                                                               | PSS Lab       |
| DP449         | DP421 <i>zip1::LYS2 DDC2-GFP::TRP1</i>                                                                                    | PSS Lab       |
| DP460         | DP421 <i>zip1::LYS2 ndt80::LEU2 DDC2-GFP::TRP1</i>                                                                        | PSS Lab       |
| DP582         | DP421 <i>zip1::LYS2 ndt80::LEU2 MEK1-GFP::kanMX6</i>                                                                      | PSS Lab       |
| DP700         | DP421 <i>hop1::hphMX4</i>                                                                                                 | This work     |
| DP881         | DP421 <i>zip1::LYS2 pch2::TRP1 ndt80::LEU2</i>                                                                            | This work     |
| DP1029        | DP421 <i>zip1::LYS2 pch2::TRP1</i>                                                                                        | This work     |
| DP1058        | DP421 <i>pch2::TRP1 ndt80::LEU2</i>                                                                                       | This work     |
| DP1111        | DP421 <i>zip1::LYS2 pch2::TRP1 ndt80::LEU2 MEK1-GFP::kanMX6</i>                                                           | This work     |
| DP1151        | BR1919-2N <i>PCH2-3HA</i>                                                                                                 | This work     |
| DP1152        | BR1919-2N <i>zip1::LEU2 PCH2-3HA</i>                                                                                      | This work     |
| DP1161        | BR1919-2N <i>zip1::LEU2 pch2::TRP1</i>                                                                                    | This work     |



|        |                                                                    |           |
|--------|--------------------------------------------------------------------|-----------|
| DP1162 | BR1919-2N <i>zip1::LEU2 pch2-3HA-K320A</i>                         | This work |
| DP1163 | BR1919-2N <i>pch2-3HA-K320A</i>                                    | This work |
| DP1164 | BR1919-2N <i>pch2::TRP1</i>                                        | This work |
| DP1168 | BR1919-2N <i>rad54::LEU2</i>                                       | This work |
| DP1169 | BR1919-2N <i>zip1::URA3 rad54::LEU2</i>                            | This work |
| DP1171 | BR1919-2N <i>zip1::URA3 pch2::TRP1 rad54::LEU2</i>                 | This work |
| DP1190 | BR1919-2N <i>zip1::LEU2 ndt80::kanMX3 PCH2-3HA</i>                 | This work |
| DP1192 | BR1919-2N <i>zip1::LEU2 ndt80::kanMX3 pch2-3HA-K320A lys2/LYS2</i> | This work |
| DP1193 | BR1919-2N <i>ndt80::kanMX3 pch2-3HA-K320A lys2/LYS2</i>            | This work |
| DP1243 | BR1919-2N <i>PCH2-3MYC</i>                                         | This work |
| DP1244 | BR1919-2N <i>zip1::LEU2 PCH2-3MYC</i>                              | This work |
| DP1245 | DP421 <i>zip1::LYS2 pch2::TRP1 pph3::kanMX6</i>                    | This work |
| DP1247 | DP421 <i>pph3::kanMX6</i>                                          | This work |
| DP1249 | DP421 <i>zip1::LYS2 pph3::kanMX6</i>                               | This work |
| DP1251 | DP421 <i>zip1::LYS2 pch2::URA3 ndt80::LEU2 DDC2-GFP::TRP1</i>      | This work |
| DP1262 | BR1919-2N <i>pch2-3MYC-E399Q</i>                                   | This work |
| DP1263 | BR1919-2N <i>zip1::LEU2 pch2-3MYC-E399Q</i>                        | This work |
| DP1287 | BR1919-2N <i>pch2-3HA-E399Q</i>                                    | This work |
| DP1288 | BR1919-2N <i>zip1::LEU2 pch2-3HA-E399Q</i>                         | This work |
| DP1302 | BR1919-2N <i>zip1::LEU2 pch2-3HA-E399Q ndt80::kanMX3</i>           | This work |
| DP1325 | BR1919-2N <i>PCH2-3HA / PCH2-3MYC</i>                              | This work |
| DP1329 | BR1919-2N <i>PCH2 / PCH2-3MYC</i>                                  | This work |
| DP1337 | BR1919-2N <i>pch2-3HA-K320A / pch2-3MYC-K320A</i>                  | This work |
| DP1378 | DP421 <i>zip1::LYS2 rad54::LEU2 DDC2-GFP::TRP1</i>                 | This work |
| DP1379 | DP421 <i>zip1::LYS2 pch2::URA3 DDC2-GFP::TRP1</i>                  | This work |
| DP1381 | DP421 <i>zip1::LYS2 rad51::natMX4 DDC2-GFP::TRP1</i>               | This work |
| DP1382 | DP421 <i>zip1::LYS2 rad51::natMX4 pch2::URA3 DDC2-GFP::TRP1</i>    | This work |
| DP1384 | BR1919-2N <i>zip3::URA3</i>                                        | This work |
| DP1386 | BR1919-2N <i>zip3::URA3 pch2::TRP1</i>                             | This work |
| DP1387 | DP421 <i>zip1::LYS2 rad54::LEU2 pch2::URA3 DDC2-GFP::TRP1</i>      | This work |

|        |                                           |           |
|--------|-------------------------------------------|-----------|
| DP1388 | BR1919-2N <i>ecm11::kanMX6</i>            | This work |
| DP1390 | BR1919-2N <i>ecm11::kanMX6 pch2::TRP1</i> | This work |

\* All strains are diploids isogenic to BR2495 or BR1919 and, unless specified, homozygous for the indicated markers. DP421 is a *lys2* version of the original BR1919-2N.

**Table S2. Plasmids**

| <b>Plasmid name</b> | <b>Vector</b> | <b>Relevant parts</b>                    | <b>Source</b>     |
|---------------------|---------------|------------------------------------------|-------------------|
| R1566               | YCp50         | <i>URA3 CEN4 lacZ</i>                    | Roeder Lab        |
| pSS51               | YCp50         | <i>URA3 CEN4 pch2-lacZ</i>               | This work         |
| pSS67               | pUC18         | <i>pch2-lacZ::TRP1</i>                   | This work         |
| pSS54               | YEp352        | <i>URA3 2<math>\mu</math> PCH2</i>       | This work         |
| R1692               | YEp24         | <i>URA3 2<math>\mu</math> HOP1</i>       | Hollingsworth Lab |
| pSS314              | pJET1.2       | <i>HOP1</i>                              | This work         |
| pSS315              | pJET1.2       | <i>hop1-T318A</i>                        | This work         |
| pSS316              | pRS426        | <i>URA3 2<math>\mu</math> HOP1</i>       | This work         |
| pSS317              | pRS426        | <i>URA3 2<math>\mu</math> hop1-T318A</i> | This work         |

**Table S3. Primary antibodies**

| Antibody       | Host and type     | Application* (Dilution)   | Source / Reference                |
|----------------|-------------------|---------------------------|-----------------------------------|
| Mek1           | Rabbit polyclonal | WB (1:2000)               | (1)                               |
| Cdc5           | Goat polyclonal   | WB (1:1000)               | Santa Cruz Biotechnology sc-6733  |
| Hop1           | Rabbit polyclonal | WB (1:2000)<br>IF (1:400) | (2)                               |
| Hop1-T318-P    | Rabbit polyclonal | WB (1:1000)<br>IF (1:150) | Jesús Carballo (3)                |
| H3-T11-P       | Rabbit polyclonal | WB (1:2000)               | Abcam ab5168                      |
| Rad51          | Rabbit polyclonal | IF (1:300)                | Santa Cruz Biotechnology sc-33626 |
| GFP            | Rabbit polyclonal | IF (1:400)                | Molecular Probes A-6455           |
| Phospho-(S/T)Q | Rabbit polyclonal | IF (1:400)                | Cell Signaling Technology #2851   |
| HA (12CA5)     | Mouse monoclonal  | WB (1:2000)<br>IF (1:200) | Roche 11 666 606 001              |
| Myc (4A6)      | Mouse monoclonal  | IF (1:200)<br>WB (1:1000) | Millipore 05-724                  |
| GFP (JL-8)     | Mouse monoclonal  | IF (1:200)                | Clontech 632381                   |
| PGK (22C5)     | Mouse monoclonal  | WB (1:10000)              | Molecular Probes A-6457           |
| Tubulin (TAT1) | Mouse monoclonal  | IF (1:400)                | (4)                               |

\*WB, western blot; IF, immunofluorescence

1. Ontoso, D., Acosta, I., van Leeuwen, F., Freire, R. and San-Segundo, P.A. (2013) Dot1-dependent histone H3K79 methylation promotes activation of the Mek1 meiotic checkpoint effector kinase by regulating the Hop1 adaptor. *PLoS genetics*, **9**, e1003262.
2. Smith, A.V. and Roeder, G.S. (1997) The yeast Red1 protein localizes to the cores of meiotic chromosomes. *J Cell Biol*, **136**, 957-967.
3. Carballo, J.A., Johnson, A.L., Sedgwick, S.G. and Cha, R.S. (2008) Phosphorylation of the axial element protein Hop1 by Mec1/Tel1 ensures meiotic interhomolog recombination. *Cell*, **132**, 758-770.
4. Refolio, E., Cavero, S., Marcon, E., Freire, R. and San-Segundo, P.A. (2011) The Ddc2/ATRIP checkpoint protein monitors meiotic recombination intermediates *J. Cell Sci.*, **124**, 2488-2500.
